# Supplementary material
Source: PubMed Central journal article supplement (PMC4878188)
Supplement: 10.1194_M067512_jlr.M067512-1.pdf [file 10.1194_M067512_jlr.M067512-1.pdf]

**SUPPLEMENTAL INFORMATION:**

**Interactions of 2-O-Arachidonylglycerol Ether and Ibuprofen with  
The Allosteric and Catalytic Subunits of Human Cyclooxygenase-2**

Liang Dong<sup>#</sup>, Hechang Zou<sup>#</sup>, Chong Yuan<sup>#</sup>, Yu H. Hong<sup>#</sup>,  
Charis L. Uhlson<sup>&</sup>, Robert C. Murphy<sup>†&</sup> and William L. Smith<sup>†#</sup>

<sup>#</sup>Department of Biological Chemistry, University of Michigan, Ann Arbor, MI 48109 USA

<sup>&</sup>Department of Pharmacology, University of Colorado-Denver, Aurora, CO 80045

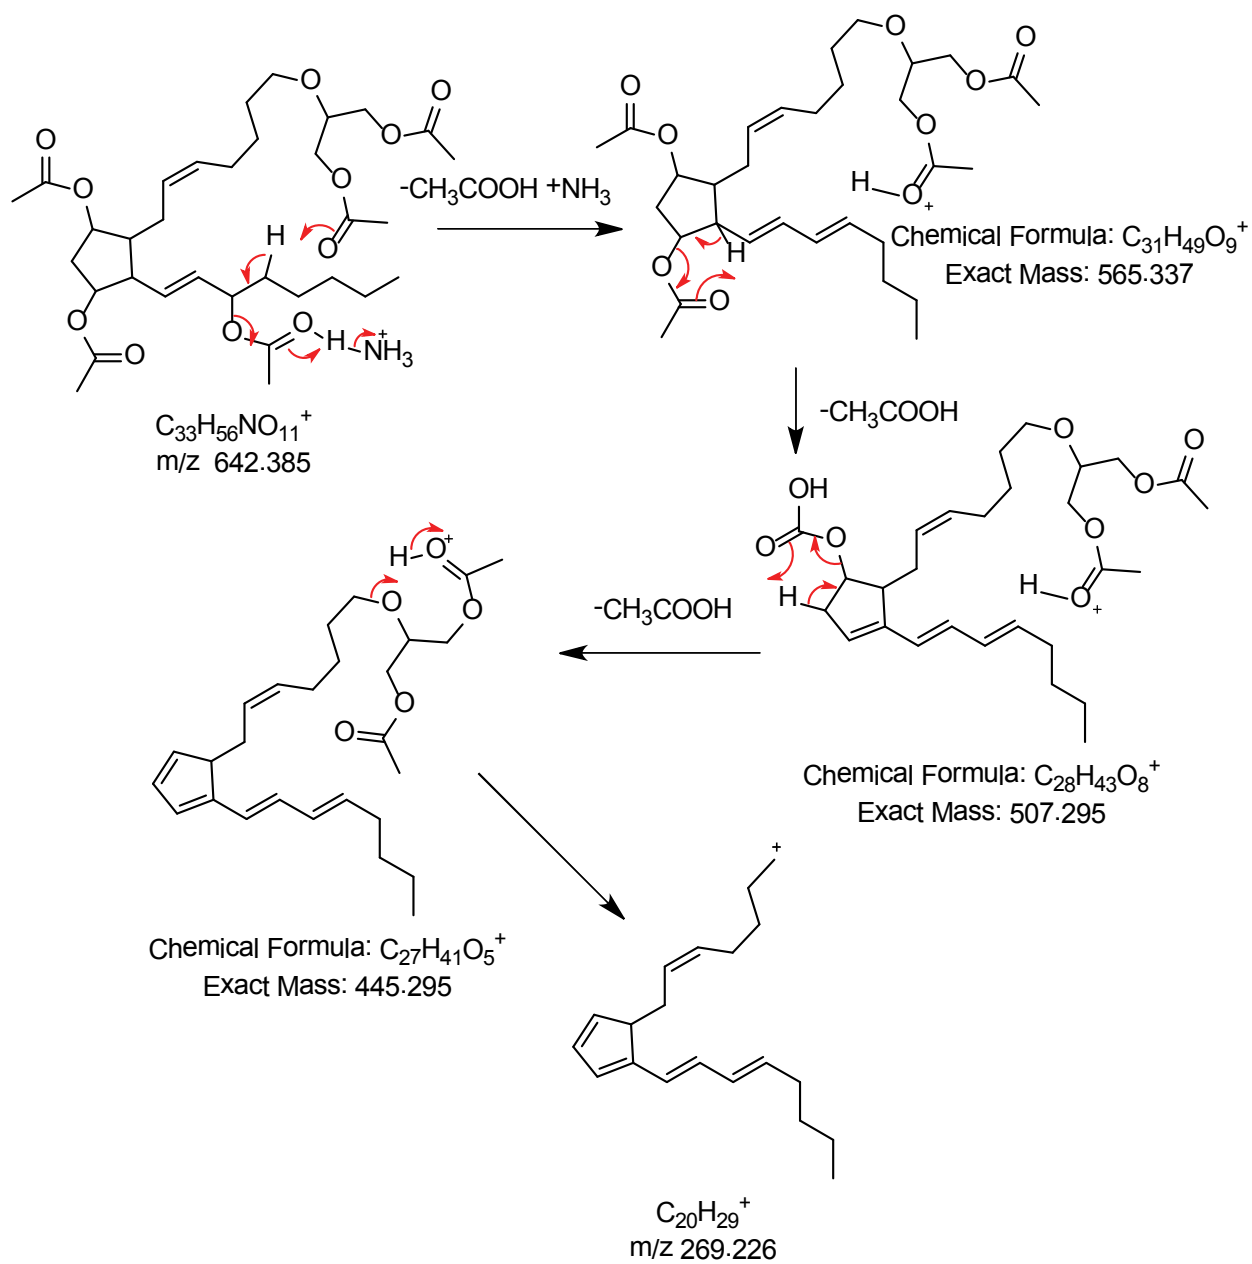

Supplemental Figure S1

**Supplemental Fig. S1: Proposed pathway operating to form the major fragment ion from Peak C obtained by MS/MS.**

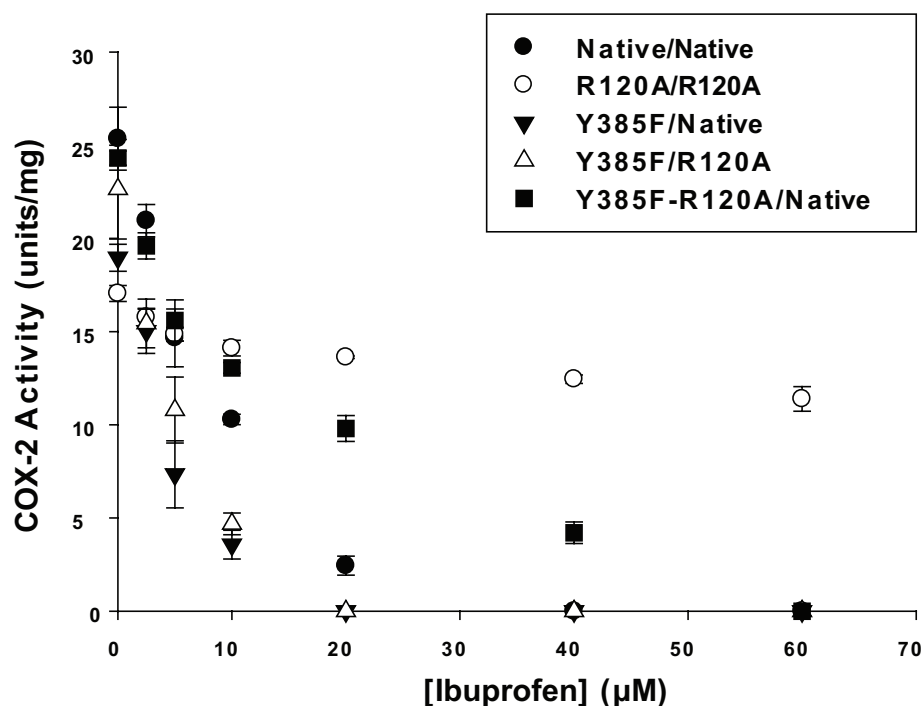

**Fig. 2S. Instantaneous inhibition by *S*-ibuprofen of 2-AG ether oxygenation by huPGHS-2 variants having an Arg-120 substitution in  $E_{\text{allo}}$  or  $E_{\text{cat}}$ .** Assays of  $O_2$  consumption using an  $O_2$  electrode were performed as described in Experimental Procedures on the parent publication using  $50 \mu\text{M}$  2-AG ether as the substrate. huPGHS-2 heterodimer variants were described previously (15). The designations indicate the mutations in the subunits. For example, Y385F R120A/Native indicates a PGHS-2 molecule having one subunit with both Y385F and R120A mutations and the other subunit as having no mutations (i.e. a Native subunit); R120A/R120A indicates a PGHS-2 molecule with mutations in both subunits. Results are shown for a single experiment involving triplicate determinations. Relative COX-2 activities derived from these data in Fig. 2S are compared in Fig. 6 of the parent publication. Specific activities for the huPGHS-2 variants with 2-AG ether ( $50 \mu\text{M}$ ) were as follows: For Native, 25 units/mg; for R120A/R120A, 17 units/mg; for Y385F/Native, 19 units/mg; for Y385F R120A/Native, 24 units/mg and Y385F/R120A, 22 units/mg.
